# Supplementary material
Source: PubMed Central journal article supplement (PMC5559303)
Supplement: NIHMS886098-supplement-1.pdf [file NIHMS886098-supplement-1.pdf]

## Supplementary Information

A)

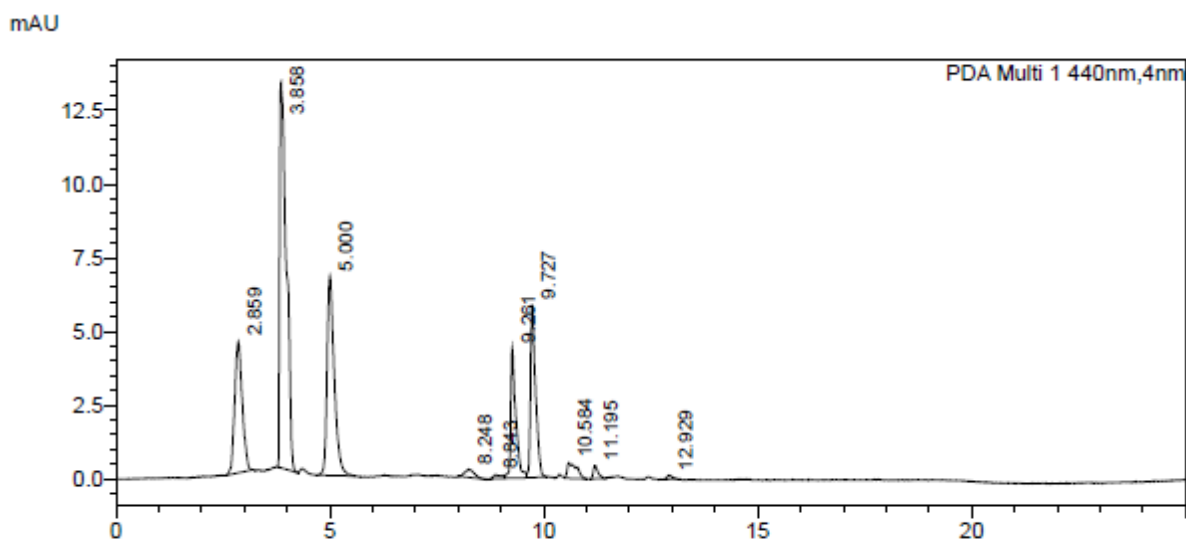

B)

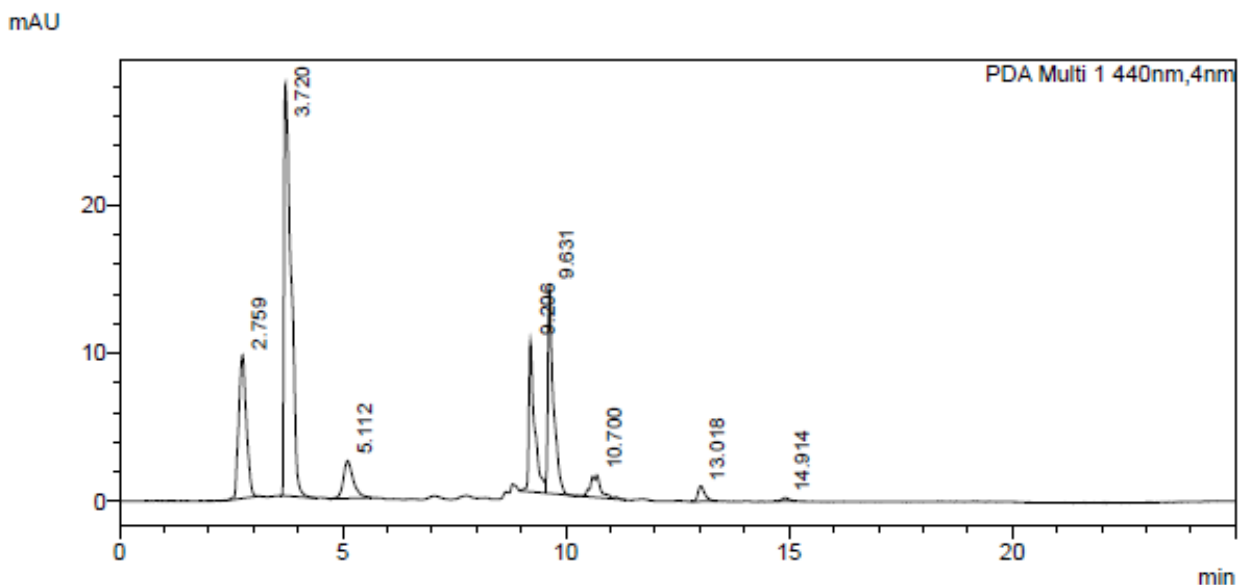

Fig. S1. HPLC chromatograms of (A) a hydroalcoholic extract of *Crocus sativus* stigma, and (B) crocin (obtained from sigma). The chromatograms showed the presence of primarily six crocins including *trans*-5-ng-crocin ( $t_R = 2.8$  min), *trans*-4-GG-crocin ( $t_R = 3.8$  min) *trans*-3-Gg-crocin ( $t_R = 5.0$  min), *trans*-2-gg-crocin ( $t_R = 8.8$  min), *cis*-4-GG-crocin ( $t_R = 9.7$  min) and *cis*-3-Gg-crocin ( $t_R = 10.6$  min). The extract was standardized for the content of *trans*-4-GG-crocin as it is the major crocin in the extract. See the results for details.
